# Supplementary material for: Green synthesis of ZnO–Co3O4 nanocomposite using facile foliar fuel and investigation of its electrochemical behaviour for supercapacitors
Source: Royal Society of Chemistry journal article supplement (doi:10.1039/d0nj03430d), 2020-01-01
Supplement: d0nj03430d1.pdf [file d0nj03430d1.pdf]

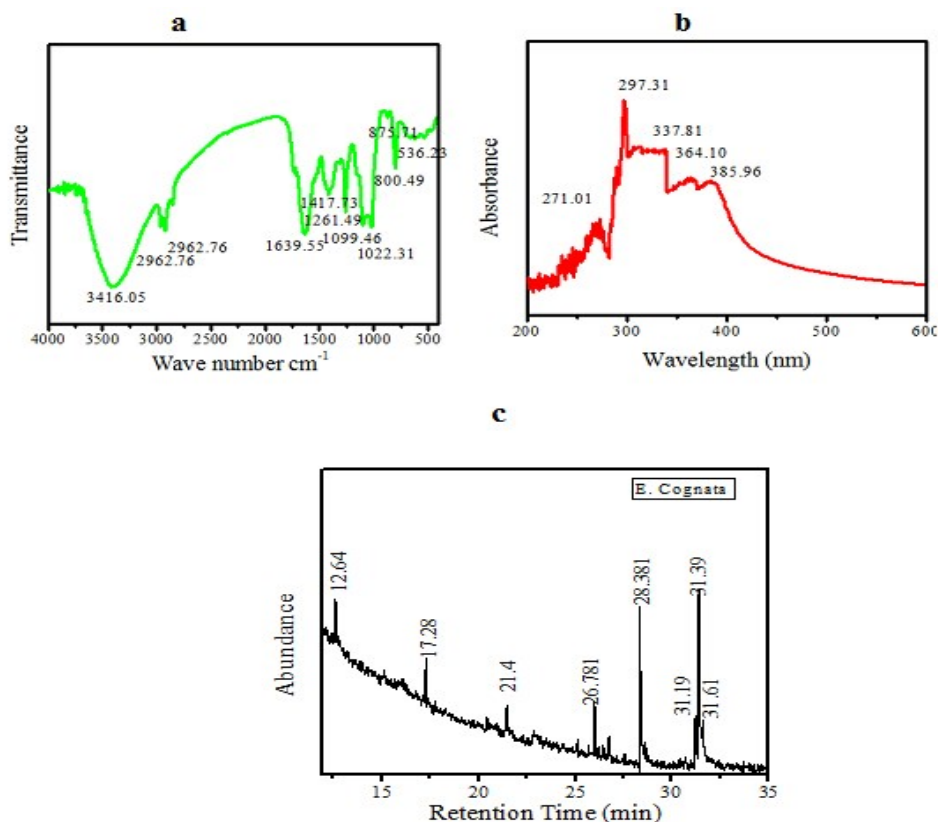

**S1 Figure 1:** (a) Fourier Transform Infrared Spectra of the Plant, (b) UV-Vis Spectra of plant Leaf Extract, And (c) GC-MS Chromatogram of the Methanolic Extract of *E. Cognata* Leaves

**S2 .Table 1:** Phytochemicals of methanolic leaf extract of *E. Cognata* Individualized by GC-MS.

| R. Time | Area (%) | Height (%) | Mol. weight | Chemical Formula                               | Name                    |
|---------|----------|------------|-------------|------------------------------------------------|-------------------------|
| 12.64   | 3.70     | 7.49       | 129         | C <sub>8</sub> H <sub>19</sub> N               | Octodrine               |
| 17.28   | 0.88     | 1.41       | 72.11       | C <sub>4</sub> H <sub>8</sub> O                | cyclobutanol            |
| 21.4    | 0.79     | 0.98       | 171         | C <sub>11</sub> H <sub>25</sub> N              | 1-Methyldecylamine      |
| 26.78   | 0.98     | 1.51       | 89          | C <sub>3</sub> H <sub>7</sub> NO <sub>2</sub>  | d-Alanine               |
| 28.38   | 12.92    | 24.95      | 172         | C <sub>10</sub> H <sub>20</sub> O <sub>2</sub> | Decanoic acid           |
| 31.39   | 16.95    | 29.44      | 125         | C <sub>8</sub> H <sub>15</sub> N               | Azabicyclo[3.2.2]nonane |
| 31.19   | 0.65     | 0.79       | 125         | C <sub>8</sub> H <sub>15</sub> N               | Azabicyclo[3.2.2]nonane |
| 31.61   | 7.2      | 7.10       | 127         | C <sub>8</sub> H <sub>17</sub> N               | Cyclohexylethylamine    |

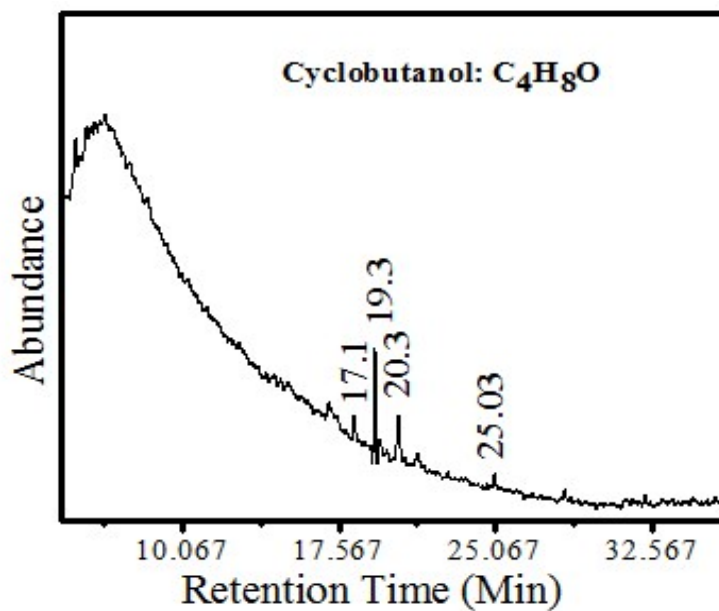

**S3 Figure 2:** GC-MS Chromatogram of synthesized nanocomposite presenting incorporated organic compound.

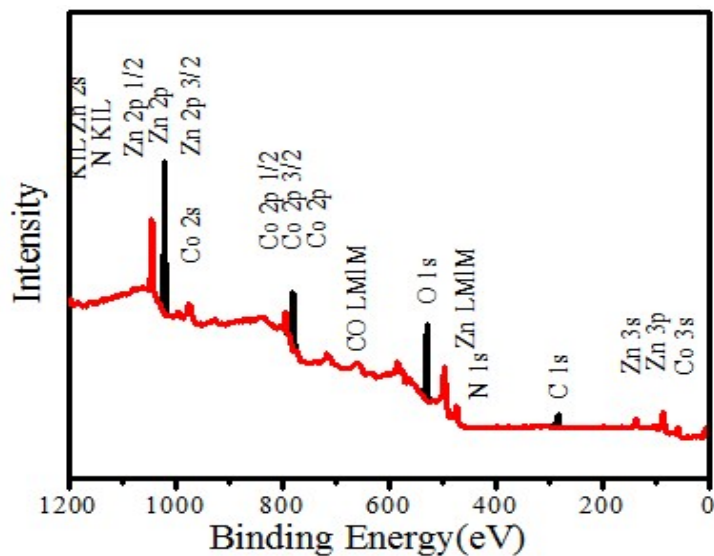

**S4 Figure 3 :** survey scan of ZnO- $Co_3O_4$  nanocomposite

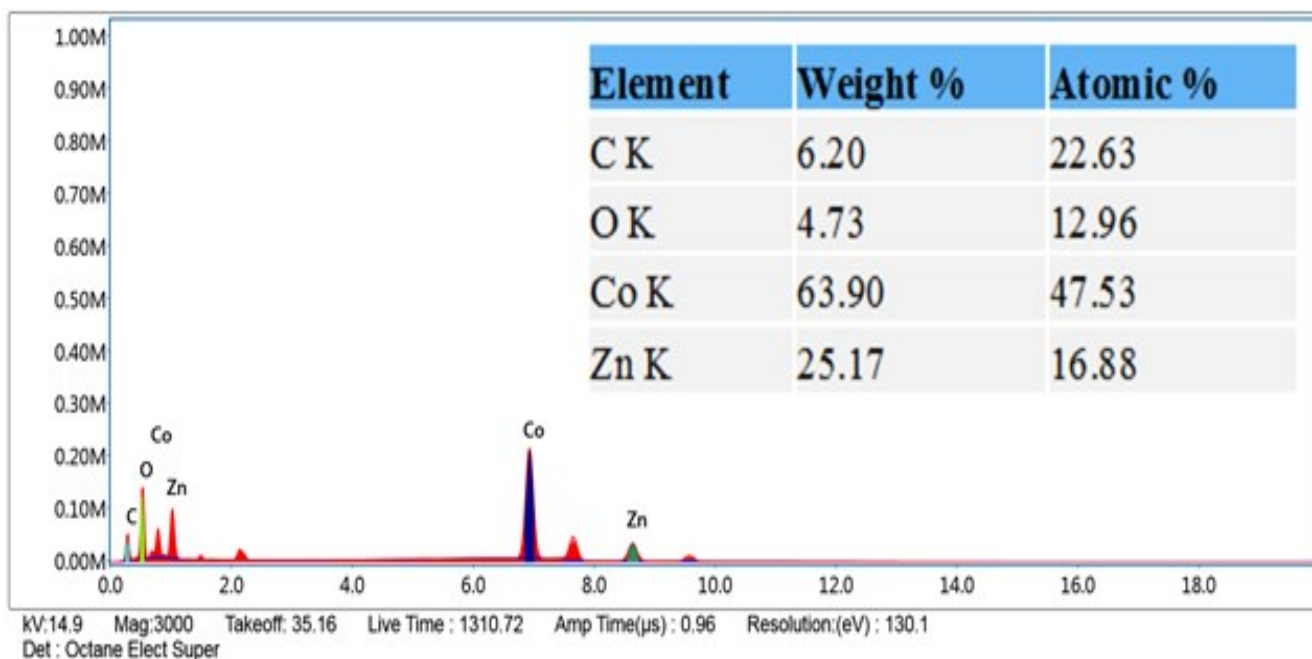

**S5 Figure 4:** Elemental analysis of ZnO-Co<sub>3</sub>O<sub>4</sub> nanocomposite by Energy-dispersive X-ray spectroscopy

**S6 Table 2:** Functional groups of foliar mediated ZnO-Co<sub>3</sub>O<sub>4</sub> identified by FTIR.

| Sr. No | Material                                     | Peaks (cm <sup>-1</sup> ) | Bond                     | Functional groups                               | References |
|--------|----------------------------------------------|---------------------------|--------------------------|-------------------------------------------------|------------|
| 1      | ZnO-Co <sub>3</sub> O <sub>4</sub> at 95 °C  | 3610                      | O-H stretching, hydroxyl | Alcohols/phenols                                | 23-25      |
|        |                                              | 2448                      | C-H stretching           | aromatics                                       | 40-41      |
|        |                                              | 1736                      | C=O stretch              | Aldehydes, saturated aliphatic, carboxylic acid | 39, 41     |
|        |                                              | 1488                      | C-C stretch (in ring)    | aromatics                                       | 40-42      |
|        |                                              | 1221                      | C-N stretch              | aliphatic amines                                | 24         |
|        |                                              | 928                       | O-H bend                 | carboxylic acid                                 | 42         |
|        |                                              | 533                       | M- O                     | Metal oxides                                    | 36-38      |
| 2.     | ZnO-Co <sub>3</sub> O <sub>4</sub> at 450 °C | 3610                      | O-H stretch              | alcohols, phenols, carboxylic acid              | 23, 24     |
|        |                                              | 1739                      | C=O stretch              | Aldehydes, saturated aliphatic, carboxylic acid | 42         |
|        |                                              | 1483                      | C-C stretch (in ring)    | aromatics                                       | 39-42      |
|        |                                              | 976                       | O-H bend                 | carboxylic acid                                 | 42         |
